# Supplementary material for: Responsive changes of DNA methylation in wheat (Triticum aestivum) under water deficit
Source: PubMed Central journal article supplement (PMC7220947; doi:10.1038/s41598-020-64660-7), 2020-05-13
Supplement: 41598_2020_64660_MOESM1_ESM.pdf [file 41598_2020_64660_MOESM1_ESM.pdf]

# **Responsive changes of DNA methylation in wheat (*Triticum aestivum*) under water deficit**

**Hongying Duan, Jingyun Li, Yanqiu Zhu, Wenjing Jia, Huihui Wang, Lina Jiang, Yanqing Zhou\***

## **Supplementary information**

Table S1 The sequence of adapters and primers in MSAP

Table S2 The cycling conditions in pre-amplification of MSAP

Table S3 The pattern of DNA methylation in wheat seedlings under water deficit

## Supplementary information

Table S1 The sequence of adapters and primers in MSAP

| No. | Adapter and primer                               | Sequence                                                                              |
|-----|--------------------------------------------------|---------------------------------------------------------------------------------------|
| 1   | <i>EcoRI</i> adapter                             | 5'-CTCGTAGACTGCGTACC<br>CTGACGCATGGTTAA-5'                                            |
| 2   | <i>MspI</i> and <i>HpaII</i> adapter             | 5'-GACGATGAGTCTAGAA<br>CTACTCAGATCTTGC-5'                                             |
| 3   | <i>MspI</i> and <i>HpaII</i> adapter             | 5'- GATCATGAGTCCTGCT<br>GCTCGTCCTAGTACT-5'                                            |
| 4   | <i>EcoRI</i> pre-amplification primer            | 5'-GACTGCCTACCAATTCA-3'                                                               |
| 5   | <i>MspI/HpaII</i> pre-amplification primer       | 5'-GATGAGTCTAGAACGGT-3'                                                               |
| 6   | Selective amplification primer                   | Eo: 5'-GACTGCCTACCAATTC<br>MHo: 5'-GATGAGTCTAGAACGGT                                  |
| 7   | <i>EcoRI</i> selective amplification primer      | E1:Eo-AAC E2:Eo-AAG E3:Eo-ACA<br>E4:Eo-ACT E5:Eo-AGG E6:Eo-ACC<br>E7:Eo-ACG E8:Eo-AGC |
| 8   | <i>MspI/HpaII</i> selective amplification primer | MH4: MHo-ACA MH5: MHo-ACC<br>MH6: MHo-CCG MH7: MHo-ACT<br>MH8: MHo-TAA                |

Table S2 The cycling conditions in pre-amplification of MSAP

| Cycle name     | Temperature (°C) | Time | Number of cycles |
|----------------|------------------|------|------------------|
| Pre-PCR_1      | 72.0             | 1m   | 1                |
| Pre-PCR_2      | 94.0             | 45s  | 1                |
|                | 65.0             | 30s  |                  |
|                | 72.0             | 1m   |                  |
| Touch-down PCR | 94.0             | 30s  | 12               |
|                | 64.3             | 30s  |                  |
|                | 72.0             | 1m   |                  |
| PCR            | 94.0             | 30s  | 20               |
|                | 55.9             | 30s  |                  |
|                | 72.0             | 1m   |                  |
| Elongation     | 72.0             | 30s  | 1                |
| Store          | 4.0              | -    | -                |

The annealing temperature of Touch-down PCR was respectively 64.3°C, 63.6°C, 62.9°C, 62.2°C, 61.5°C, 60.8°C, 60.1°C, 59.4°C, 58.7°C, 58.0°C, 57.3°C and 56.6°C, respectively.

Table S3 The pattern of DNA methylation in wheat seedlings under water deficit

| No. | Band |    |    |    | Change of methylation pattern |                        | Type of methylation pattern |   |
|-----|------|----|----|----|-------------------------------|------------------------|-----------------------------|---|
|     | H1   | M1 | Hx | Mx | CK                            | Treatment              |                             |   |
| 1   | 1    | 1  | 1  | 1  | CCGG GGCC                     | CCGG GGCC              | A1                          |   |
| 2   | 1    | 0  | 1  | 0  | CCGG CCGG<br>GGCC GGCC        | CCGG CCGG<br>GGCC GGCC | A2                          | A |
| 3   | 0    | 1  | 0  | 1  | CCGG GGCC                     | CCGG GGCC              | A3                          |   |
| 4   | 1    | 1  | 1  | 0  | CCGG GGCC                     | CCGG CCGG<br>GGCC GGCC | B1                          |   |
| 5   | 1    | 1  | 0  | 1  | CCGG GGCC                     | CCGG GGCC              | B2                          |   |
| 6   | 0    | 1  | 0  | 0  | CCGG GGCC                     | CCGG GGCC              | B3                          | B |
| 7   | 1    | 0  | 0  | 0  | CCGG CCGG<br>GGCC GGCC        | CCGG GGCC              | B4                          |   |
| 8   | 1    | 1  | 0  | 0  | CCGG GGCC                     | CCGG GGCC              | B5                          |   |
| 9   | 0    | 1  | 1  | 1  | CCGG GGCC                     | CCGG GGCC              | C1                          |   |
| 10  | 1    | 0  | 1  | 1  | CCGG CCGG<br>GGCC GGCC        | CCGG GGCC              | C2                          | C |
| 11  | 0    | 0  | 0  | 1  | CCGG GGCC                     | CCGG GGCC              | C3                          |   |
| 12  | 0    | 0  | 1  | 1  | CCGG GGCC                     | CCGG GGCC              | C4                          |   |

H and M represented *EcoRI/HpaII* (H) and *EcoRI/MspI* (M), H1 and M1: bands amplified from genome of wheat seedlings under the normal condition, Hx and Mx: bands amplified from genome of wheat seedling treated with PEG<sub>6000</sub> solution. Scores of 1 and 0 indicated the presence or absence of bands in MSAP, “1 1”, “1 0” and “0 1” was considered to be the pattern of non-methylation, hemi-methylation or full-methylation, respectively.
